# Supplementary material
Source: PubMed Central journal article supplement (PMC5502314)

# Supplementary Figure 2.

A

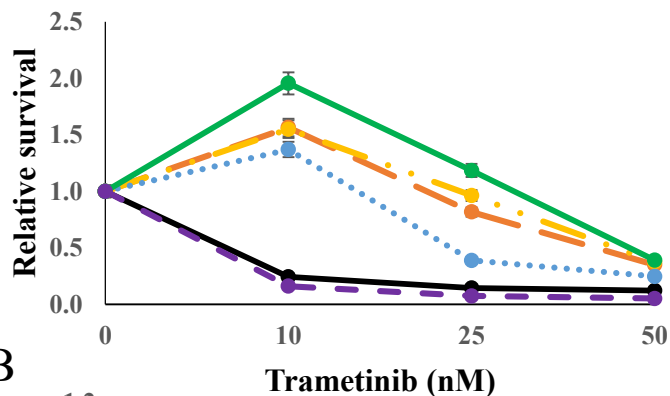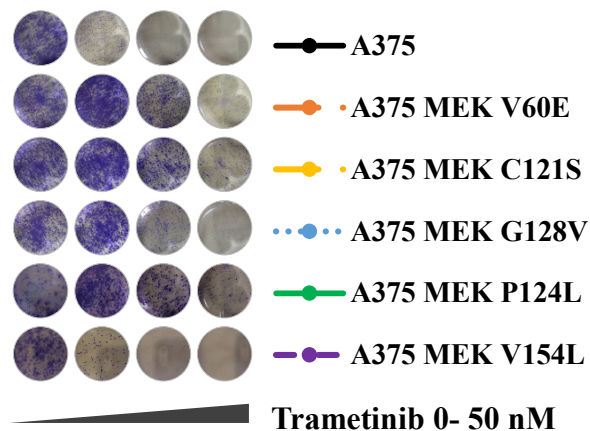

B

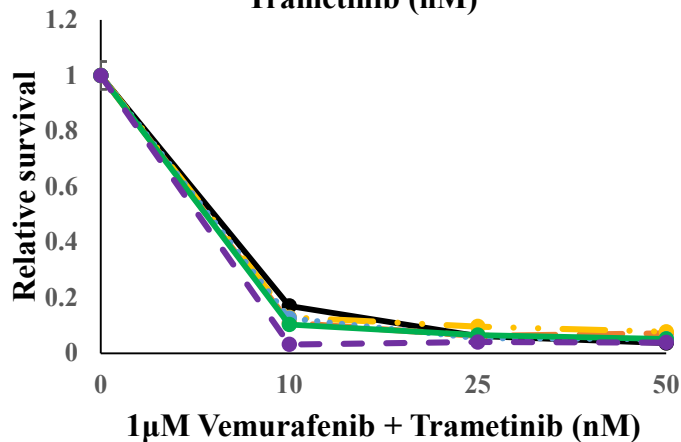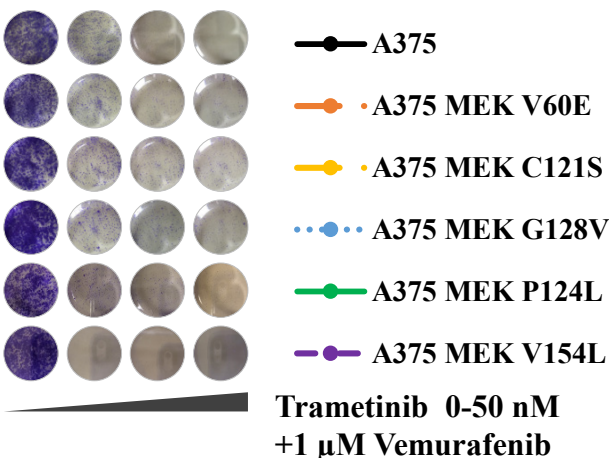

C

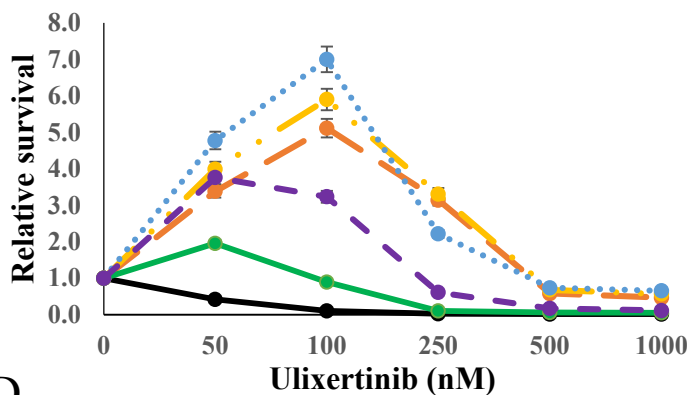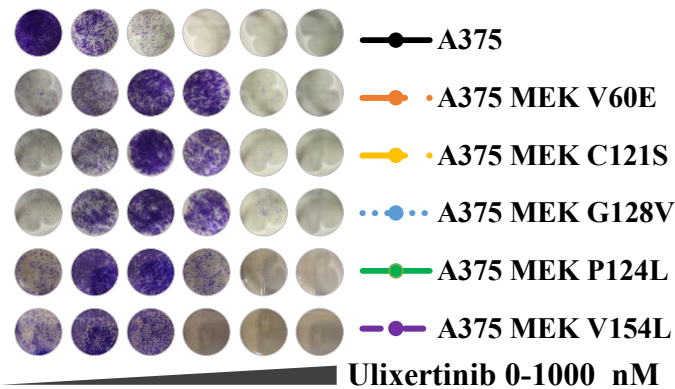

D

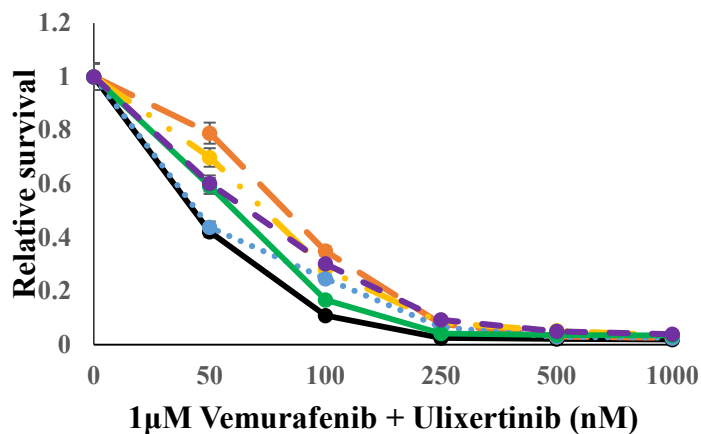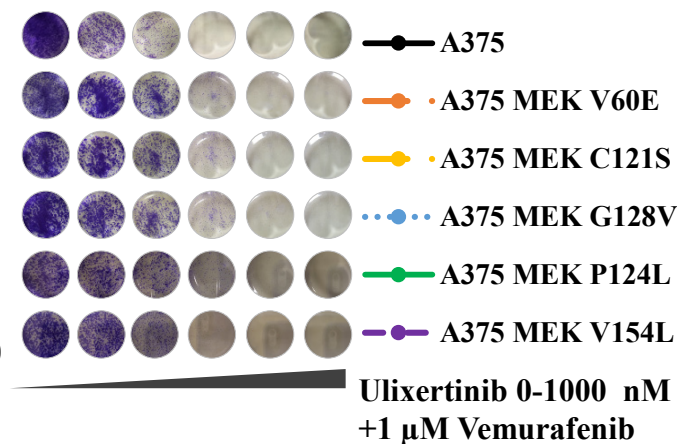

Supplement: onc2016526x2.pdf [file onc2016526x2.pdf]
