# Supplementary material
Source: PubMed Central journal article supplement (PMC5502314)

# Supplementary Figure 3.

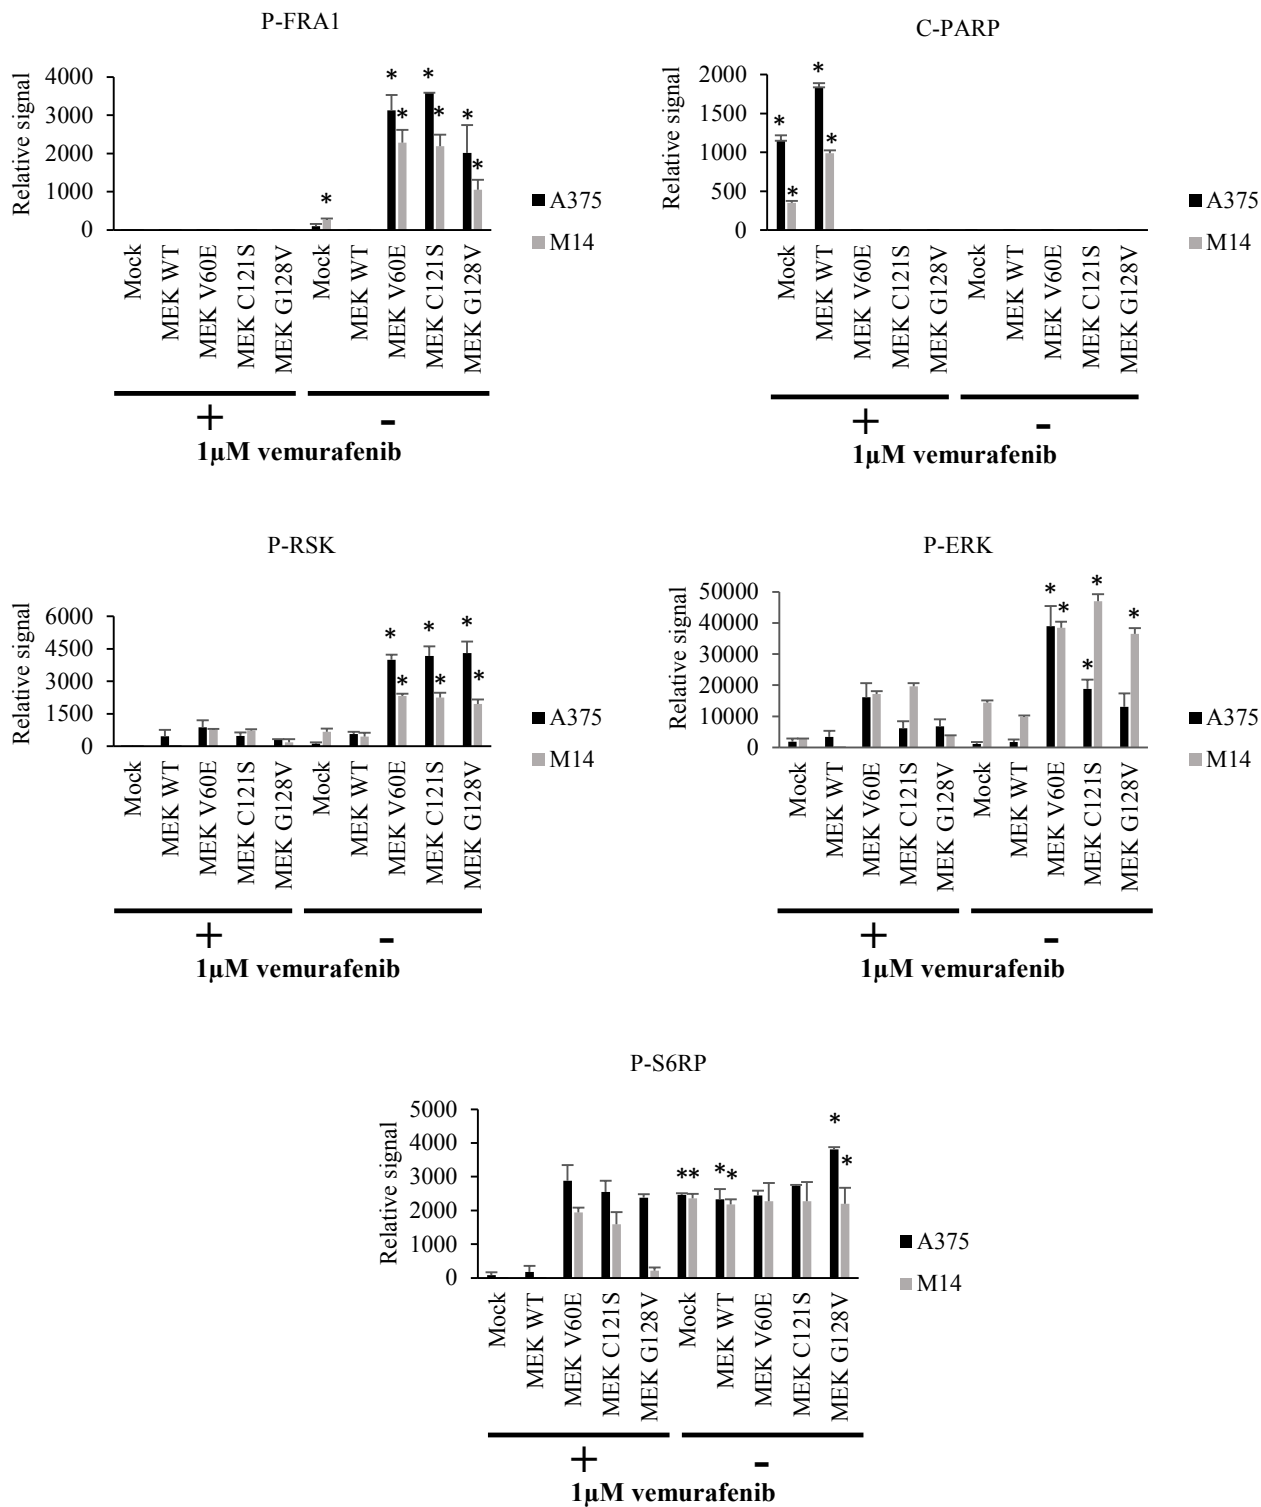

Supplement: onc2016526x3.pdf [file onc2016526x3.pdf]
