# Supplementary material
Source: PubMed Central journal article supplement (PMC5502314)

# Supplementary Figure 4.

## Cell cycle

**A**

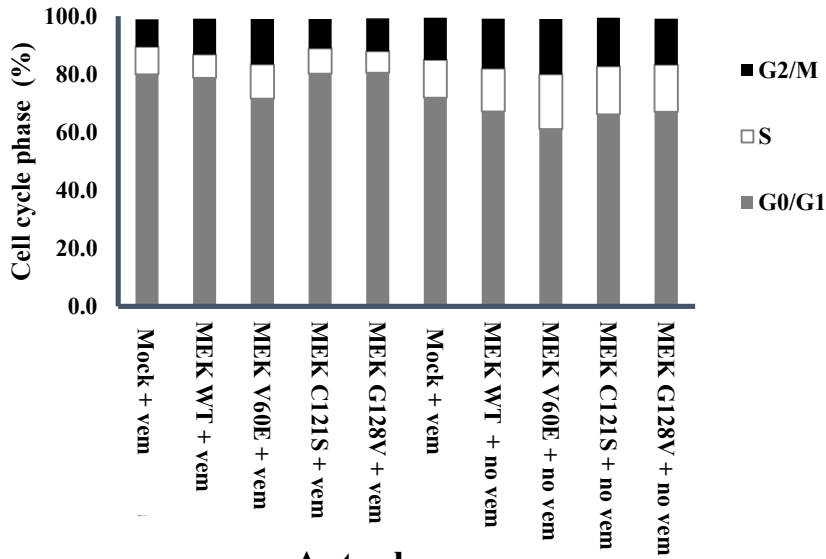

**B**

## Autophagy

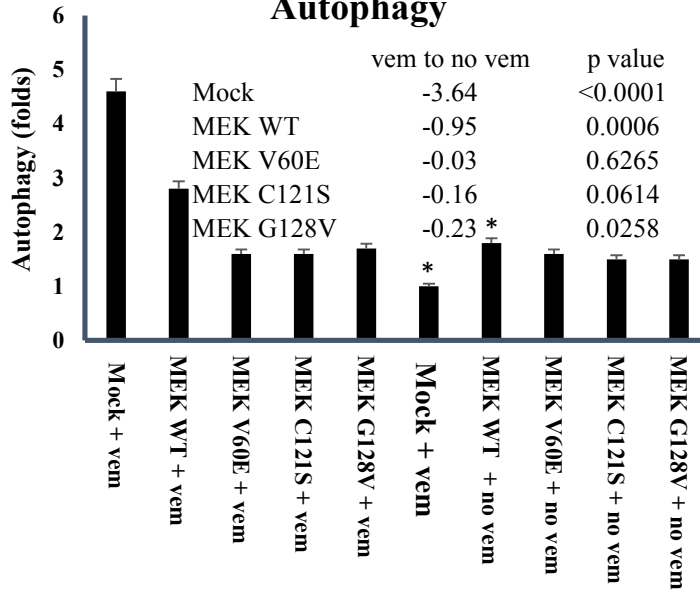

**C**

## Apoptosis

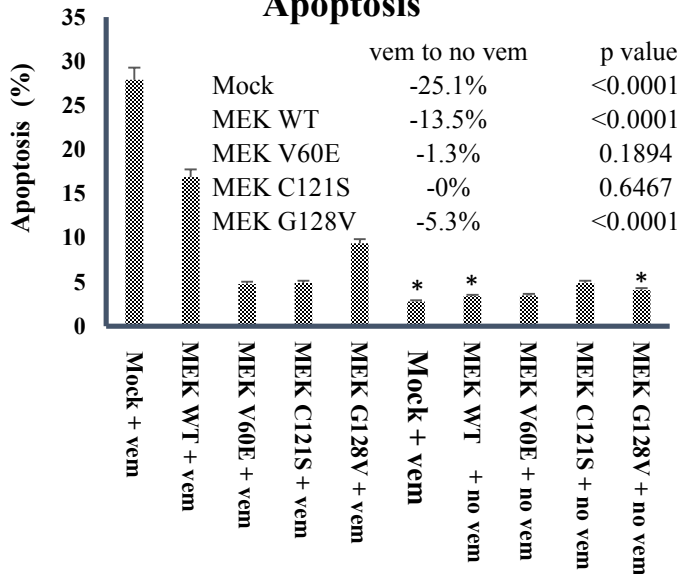

Supplement: onc2016526x4.pdf [file onc2016526x4.pdf]
